# Supplementary material for: Multiwall carbon nanotube@mesoporous carbon with core-shell configuration: a well-designed composite-structure toward electrochemical capacitor application
Source: Royal Society of Chemistry journal article supplement (doi:10.1039/c1jm12082d), 2011-01-01
Supplement: c1jm12082d.pdf [file c1jm12082d.pdf]

## Supplementary Information for

**Multiwall carbon nanotube@mesoporous carbon with core-shell configuration: a well-designed composite-structure toward supercapacitor electrode**

Xufang Qian, Yingying Lv, Wei Li, Yongyao Xia, and Dongyuan Zhao\*

Department of Chemistry, Shanghai Key Laboratory of Molecular Catalysis and Innovative Materials, and Laboratory of Advanced Materials, Fudan University, Shanghai 200433, P. R. China.

Tel: +86-21-5163-0205, Fax: +86-21-5163-0307,

E-mail: [dyzhao@fudan.edu.cn](mailto:dyzhao@fudan.edu.cn), [http://homepage.fudan.edu.cn/~dyzhao/default\\_cn.htm](http://homepage.fudan.edu.cn/~dyzhao/default_cn.htm)

[m](#)

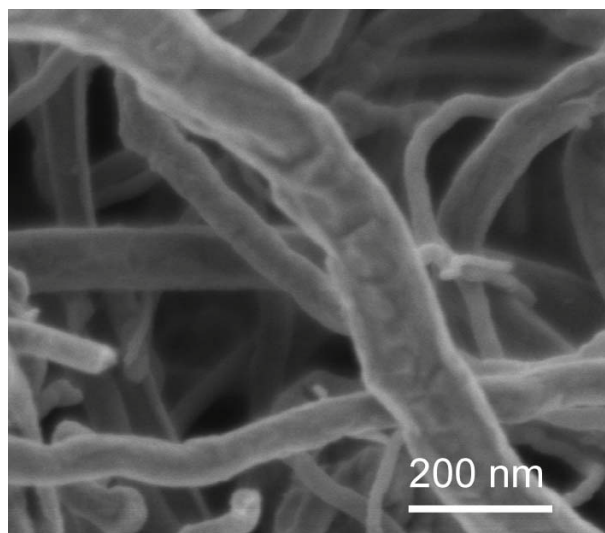

**Fig. S1** The SEM image of the pristine MWNTs with outer diameters and lengths in the range of 40 – 100 nm and 5 – 15  $\mu\text{m}$ , respectively, showing smooth surfaces.

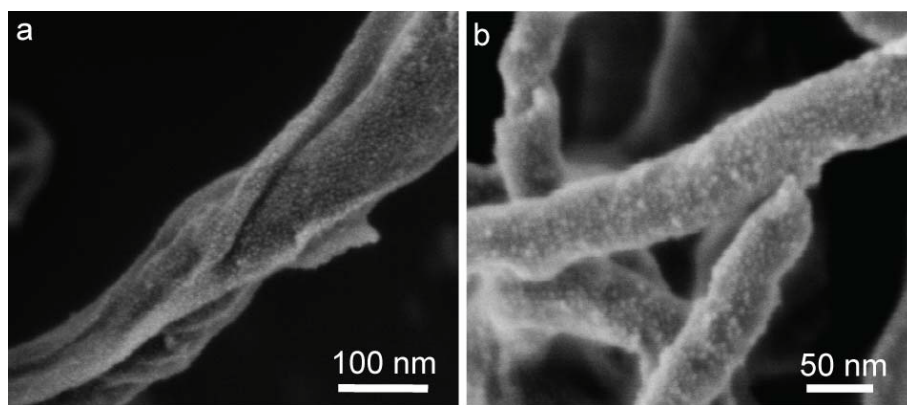

**Fig. S2** FESEM images of the uniform core-shell structured MWNT@mesoC composites with crumpled (a) and even (b) mesoC shells. The white dots on the surface of the MWNT@mesoC composite are Au nanoparticles sprayed on prior to introducing into the FESEM measurement.

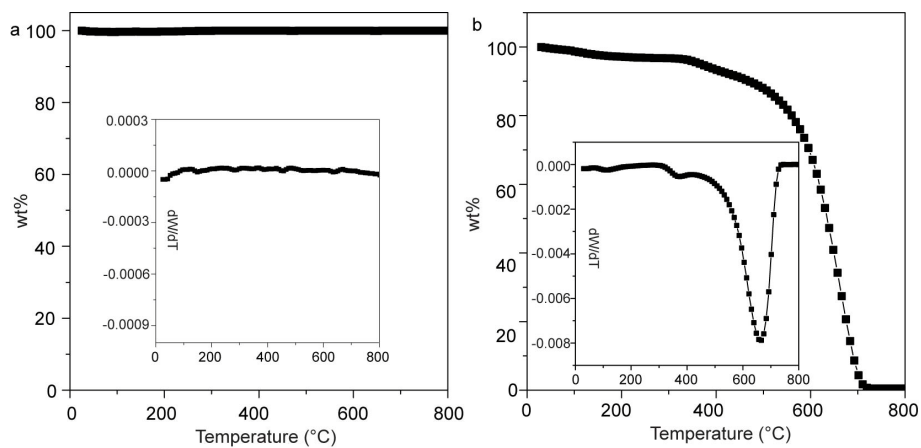

**Fig. S3** TG and DTG (inset) curves: (a) the pristine MWNTs conducted in N<sub>2</sub> from 30 to 800 °C without weight loss phenomenon suggesting the high purity; (b) the mechanical mixture comprising of the pristine MWNTs and mesoCs conducted in air from 30 to 800 °C showing a slow weight loss tendency before 500 °C and a dramatically loss step at ~ 600 °C.

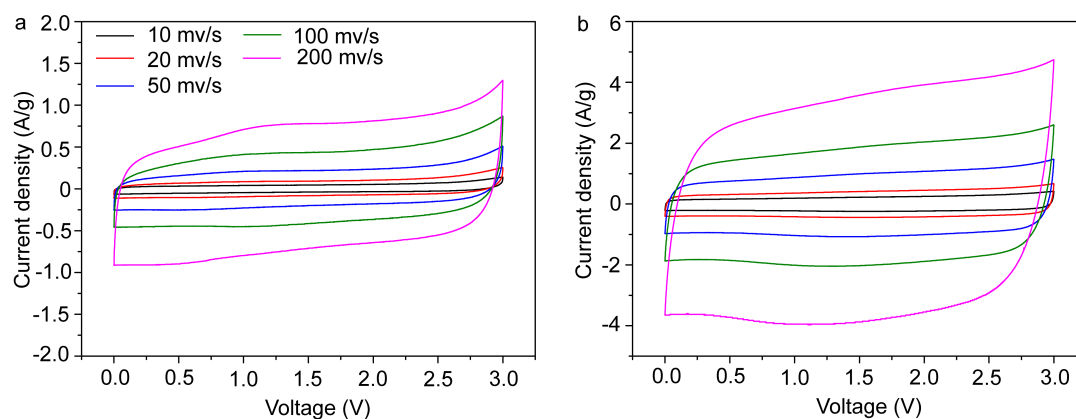

**Fig. S4** Cyclic voltammograms of (a) the pristine MWNTs and (b) core-shell structured MWNT@mesoC composites at different scan rates in 1.0 M  $(\text{C}_2\text{H}_5)_4\text{NBF}_4/\text{PC}$  electrolyte by using the two-electrode quasi-capacitor. The capacitance can be estimated by using an equation  $C = 2i/v$ , where  $C$  is the differential capacitance,  $i$  is the current density (its value at 1.5 V is used here for calculations),  $v$  is the scan rate multiplied by a factor of two because two carbon electrodes of the capacitor are connected in series.

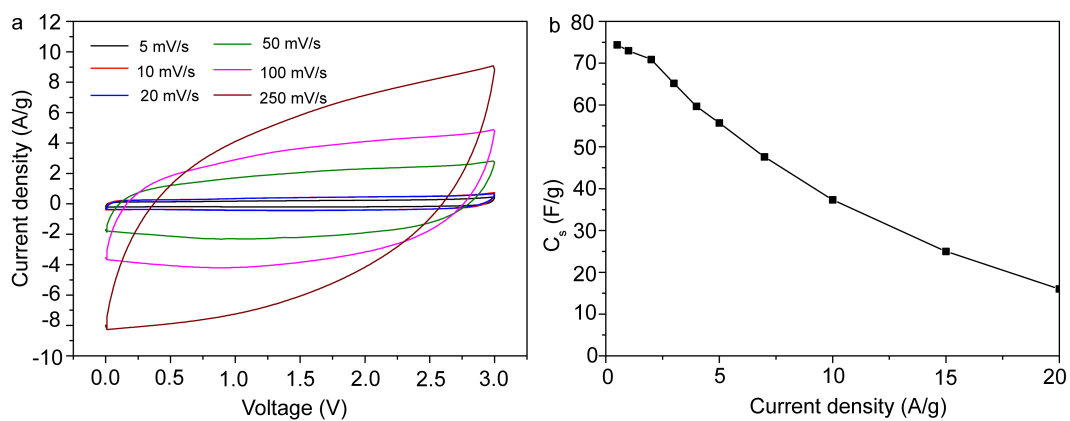

**Fig. S5** Cyclic voltammograms (a), Specific capacitance as a function of current density (b) in 1.0 M  $(C_2H_5)_4NBF_4/PC$  electrolyte by using the two-electrode quasi-capacitor of the mesoC electrode material.

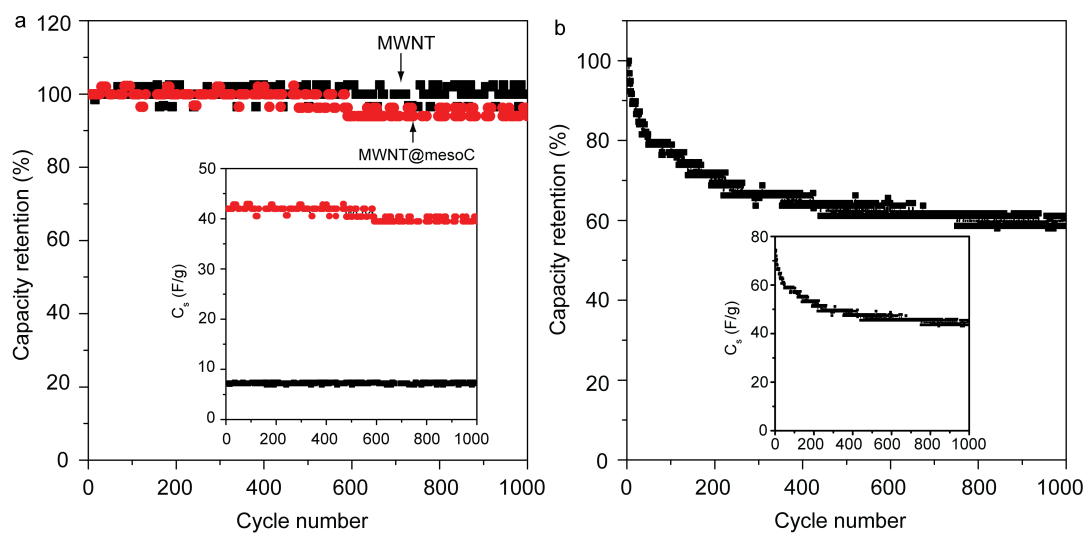

**Fig. S6** Cyclability of the pristine MWNTs, MWNT@mesoC composite (a) and mesoC (b) electrode materials under a current density of 1.0 A/g in 1.0 M  $(C_2H_5)_4NBF_4/PC$  electrolyte.

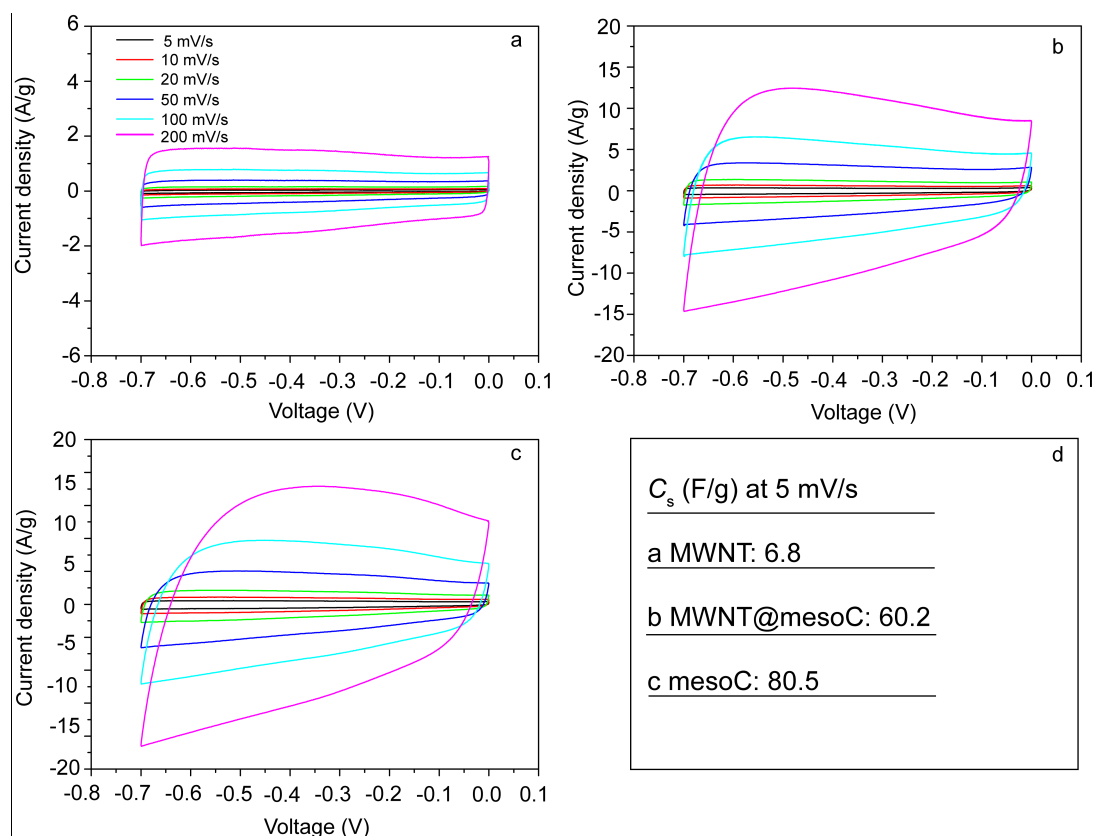

**Fig. S7** Cyclic voltammograms of (a) the pristine MWNTs, (b) MWNT@mesoC composite with core-shell configuration and (c) mesoC at different scan rates in 6 M KOH electrolyte by using the three-electrode system. (d) The calculated specific capacitance ( $C_s$ ) of three electrode materials, which are estimated using an equation  $C = i/v$ , where  $C$  is the differential capacitance,  $i$  is the current density (its value at 0.35 V is used here for calculations),  $v$  is the scan rate.



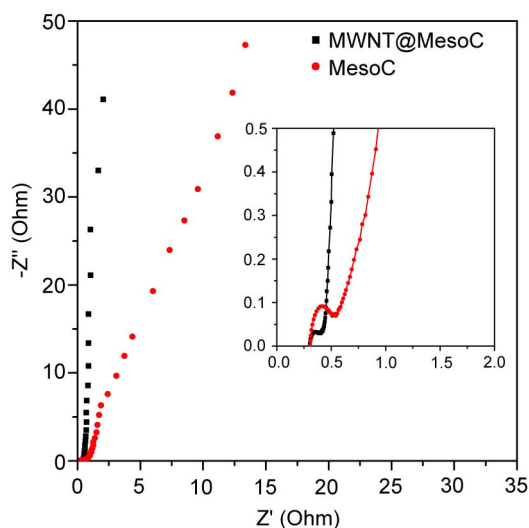

**Fig. S8** Nyquist plots of the MWNT@mesoC composite with core-shell configuration and mesoC in 6 M KOH using a Solartron Instrument model 1287 electrochemical interface and 1255B frequency response analyzer controlled by a computer. (Frequency range: 0.001 Hz ~ 100 kHz; ac-amplitude: 5 mV)

**Table S1.** Physicochemical properties of the pristine MWNTs, mesoC and composite materials with core-shell structure.

| Sample      | $S_{\text{BET}}$<br>(m <sup>2</sup> /g) | $S_{\text{micro}}$<br>(m <sup>2</sup> /g) | $S_{\text{ex}}$<br>(m <sup>2</sup> /g) | $V_{\text{micro}}$<br>(cm <sup>3</sup> /g) | $V_{\text{T}}$<br>(cm <sup>3</sup> /g) | $D_{\text{meso}}$<br>(nm) |
|-------------|-----------------------------------------|-------------------------------------------|----------------------------------------|--------------------------------------------|----------------------------------------|---------------------------|
| MWNT        | 71                                      | 8                                         | 63                                     | 0.003                                      | 0.33                                   | 40                        |
| mesoC       | 789                                     | 36                                        | 753                                    | 0.003                                      | 0.74                                   | 3.7                       |
| MWNT@mesoS  | 562                                     | 485                                       | 77                                     | 0.19                                       | 0.29                                   | 2.5                       |
| MWNT@mesoSC | 56                                      | 54                                        | 5                                      | 0.002                                      | 0.12                                   | -                         |
| MWNT@mesoC  | 381                                     | 0                                         | 381                                    | 0                                          | 0.75                                   | 3.9/40                    |
